# Supplementary material
Source: PubMed Central journal article supplement (PMC3776712)
Supplement: supp_13-12779_IOVS-13-12779-s01.pdf [file supp_13-12779_IOVS-13-12779-s01.pdf]

**Supplemental Figure 1.** Fifty seven tagging and previously reported SNPs were selected to cover the reported five genomic regions, including *TMCO1* (panel A), *CAV1/CAV2* (panel B), chromosome 8q22 intergenic region (panel C), *CDKN2B-AS1* (panel D), and *SIX1/SIX6* (panel E), in the African population (YRI). These tagging SNPs were selected using HaploView software with  $r^2 > 0.6$  and MAF > 0.05. TaqMan allelic discrimination assays were employed for genotyping these 57 SNPs by use of Assays-On-Demand products with the ViiA7 Realtime PCR system with 384-well block according to the standard protocols from the manufacturer (Applied Biosystems, Foster City, CA, USA).

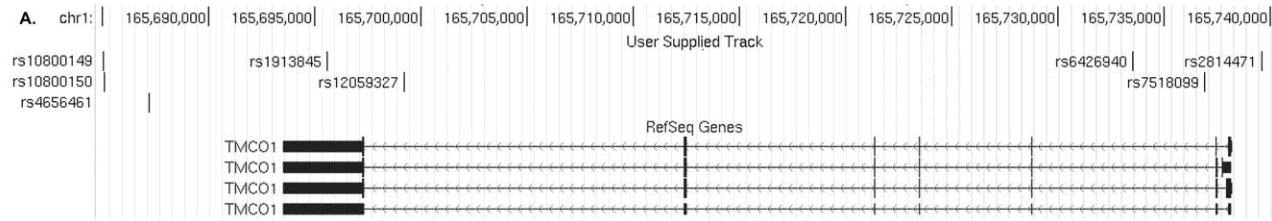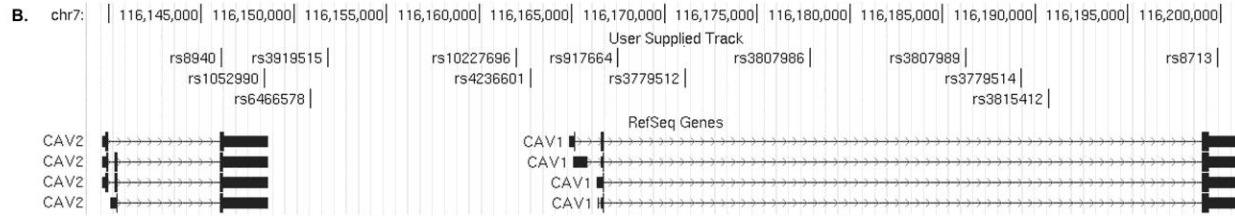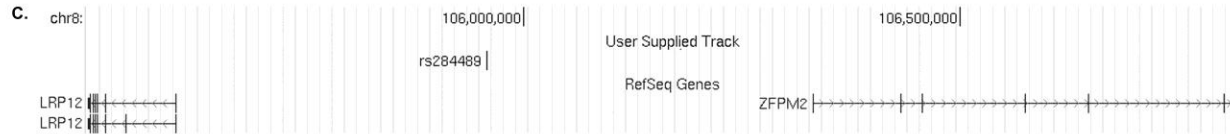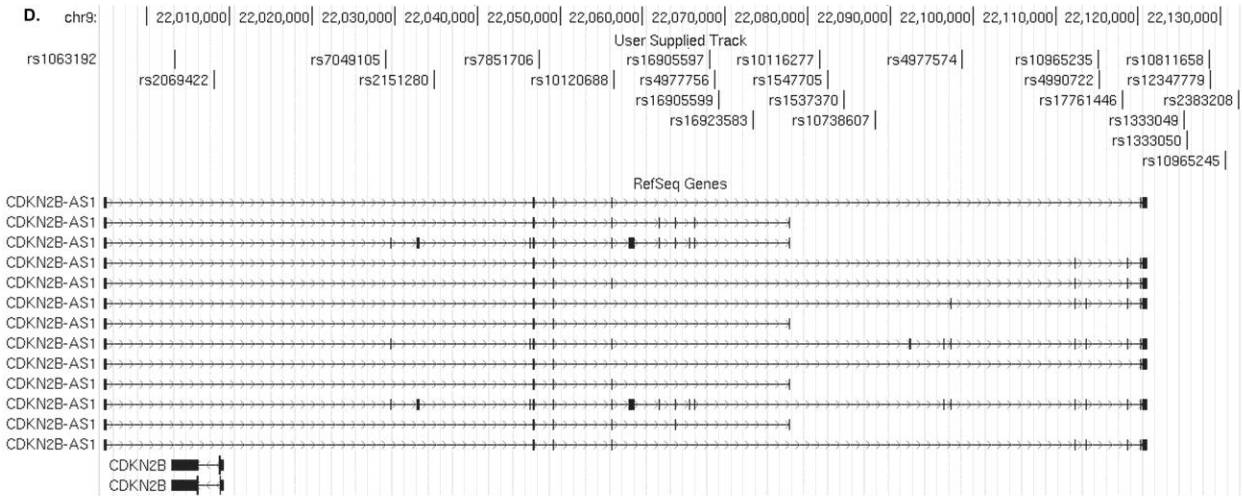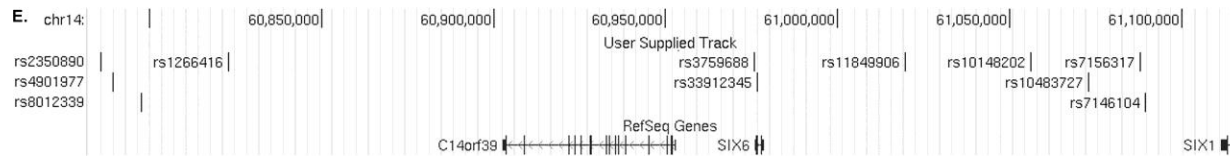

**Supplemental Table 1.** The genetic association of all 57 genotyped SNPs with POAG in the ICAARE-Glaucoma samples of African Americans and Ghanaians (West Africans).

| Genomic Regions  | SNP        | Allele | African American<br>(n=1150 case/999 control) |      |       |                     | African American HPG<br>(n=870 case/ 999 control) |      |      |                     | African American NPG<br>(n=280 case/999 control) |      |       |                     | Ghanaian<br>(n=483 case/593 control) |      |      |                     |
|------------------|------------|--------|-----------------------------------------------|------|-------|---------------------|---------------------------------------------------|------|------|---------------------|--------------------------------------------------|------|-------|---------------------|--------------------------------------|------|------|---------------------|
|                  |            |        | FU                                            | FA   | P     | OR                  | FU                                                | FA   | P    | OR                  | FU                                               | FA   | P     | OR                  | FU                                   | FA   | P    | OR                  |
| <i>TMCO1</i>     | rs10800149 | A      | 25.4                                          | 26.1 | 0.66  | 1.04<br>(0.89-1.21) | 25.4                                              | 24.8 | 0.74 | 0.97<br>(0.82-1.15) | 25.4                                             | 29.2 | 0.09  | 1.21<br>(0.97-1.51) | 19.1                                 | 22.1 | 0.10 | 1.19<br>(0.97-1.46) |
| <i>TMCO1</i>     | rs10800150 | C      | 42.7                                          | 41.8 | 0.49  | 0.96<br>(0.85-1.08) | 42.7                                              | 42.3 | 0.74 | 0.98<br>(0.86-1.11) | 42.7                                             | 40.1 | 0.29  | 0.90<br>(0.75-1.09) | 47.0                                 | 44.7 | 0.24 | 0.90<br>(0.76-1.07) |
| <i>TMCO1</i>     | rs4656461  | C      | 22.6                                          | 23.3 | 0.74  | 1.02<br>(0.89-1.18) | 22.6                                              | 23.2 | 0.82 | 1.02<br>(0.87-1.19) | 22.6                                             | 23.7 | 0.62  | 1.06<br>(0.85-1.32) | 22.6                                 | 25.6 | 0.19 | 1.14<br>(0.94-1.40) |
| <i>TMCO1</i>     | rs1913845  | C      | 81.7                                          | 82.1 | 0.74  | 1.03<br>(0.88-1.20) | 81.7                                              | 82.9 | 0.40 | 1.08<br>(0.91-1.27) | 81.7                                             | 79.7 | 0.31  | 0.89<br>(0.71-1.12) | 81.4                                 | 81.0 | 0.76 | 0.97<br>(0.78-1.20) |
| <i>TMCO1</i>     | rs12059327 | C      | 12.9                                          | 12.6 | 0.71  | 0.97<br>(0.80-1.16) | 12.9                                              | 13.1 | 0.93 | 1.01<br>(0.83-1.23) | 12.9                                             | 11.2 | 0.28  | 0.85<br>(0.63-1.15) | 13.1                                 | 15.1 | 0.22 | 1.17<br>(0.91-1.51) |
| <i>TMCO1</i>     | rs6426940  | C      | 42.4                                          | 42.3 | 0.94  | 1.00<br>(0.89-1.13) | 42.4                                              | 42.1 | 0.98 | 1.00<br>(0.88-1.14) | 42.4                                             | 42.6 | 0.92  | 1.01<br>(0.84-1.22) | 40.5                                 | 38.2 | 0.31 | 0.91<br>(0.77-1.09) |
| <i>TMCO1</i>     | rs7518099  | C      | 8.3                                           | 10.3 | 0.048 | 1.27<br>(1.00-1.62) | 8.3                                               | 10.0 | 0.12 | 1.23<br>(0.95-1.59) | 8.3                                              | 11.0 | 0.05  | 1.39<br>(0.99-1.93) | 7.0                                  | 9.1  | 0.11 | 1.29<br>(0.94-1.75) |
| <i>TMCO1</i>     | rs2814471  | C      | 12.0                                          | 13.3 | 0.27  | 1.11<br>(0.93-1.32) | 12.0                                              | 12.4 | 0.80 | 1.03<br>(0.85-1.24) | 12.0                                             | 15.9 | 0.019 | 1.37<br>(1.05-1.77) | 12.5                                 | 13.4 | 0.76 | 1.04<br>(0.81-1.34) |
| <i>CAV1/CAV2</i> | rs8940     | C      | 81.4                                          | 79.1 | 0.051 | 0.86<br>(0.74-1.00) | 81.4                                              | 79.2 | 0.08 | 0.86<br>(0.73-1.02) | 81.4                                             | 78.8 | 0.15  | 0.84<br>(0.66-1.06) | 82.3                                 | 79.4 | 0.10 | 0.83<br>(0.67-1.04) |
| <i>CAV1/CAV2</i> | rs1052990  | A      | 61.2                                          | 58.0 | 0.029 | 0.87<br>(0.77-0.99) | 61.2                                              | 58.2 | 0.06 | 0.88<br>(0.77-1.00) | 61.2                                             | 57.2 | 0.08  | 0.85<br>(0.70-1.02) | 61.3                                 | 57.8 | 0.11 | 0.87<br>(0.73-1.03) |
| <i>CAV1/CAV2</i> | rs6466578  | C      | 19.6                                          | 18.1 | 0.23  | 0.91<br>(0.78-1.06) | 19.6                                              | 18.7 | 0.52 | 0.95<br>(0.80-1.12) | 19.6                                             | 16.3 | 0.08  | 0.80<br>(0.62-1.03) | 21.4                                 | 18.8 | 0.19 | 0.86<br>(0.70-1.07) |
| <i>CAV1/CAV2</i> | rs3919515  | C      | 38.4                                          | 37.3 | 0.41  | 0.95<br>(0.84-1.08) | 38.4                                              | 37.3 | 0.44 | 0.95<br>(0.83-1.09) | 38.4                                             | 37.2 | 0.59  | 0.95<br>(0.78-1.15) | 37.4                                 | 36.2 | 0.56 | 0.95<br>(0.79-1.13) |
| <i>CAV1/CAV2</i> | rs10227696 | A      | 18.7                                          | 20.5 | 0.13  | 1.13<br>(0.97-1.31) | 18.7                                              | 20.2 | 0.20 | 1.11<br>(0.94-1.32) | 18.7                                             | 21.1 | 0.18  | 1.17<br>(0.93-1.49) | 17.3                                 | 20.3 | 0.09 | 1.21<br>(0.97-1.51) |

| Genetic Association Results for CAV1/CAV2 and CDKN2B-AS1 |                   |        |                       |      |              |                             |        |                        |       |                     |      |        |                |                     |      |      |        |                     |
|----------------------------------------------------------|-------------------|--------|-----------------------|------|--------------|-----------------------------|--------|------------------------|-------|---------------------|------|--------|----------------|---------------------|------|------|--------|---------------------|
| Locus                                                    | SNP               | Allele | CAV1/CAV2 Association |      |              |                             |        | CDKN2B-AS1 Association |       |                     |      |        | Joint Analysis |                     |      |      |        |                     |
|                                                          |                   |        | β                     | SE   | p            | OR                          | 95% CI | β                      | SE    | p                   | OR   | 95% CI | β              | SE                  | p    | OR   | 95% CI |                     |
| CAV1/CAV2                                                | rs4236601         | A      | 36.2                  | 39.5 | 0.020        | 1.16<br>(1.02-1.31)         | 36.2   | 39.2                   | 0.050 | 1.14<br>(1.00-1.31) | 36.2 | 40.7   | 0.05           | 1.21<br>(1.00-1.47) | 37.6 | 41.7 | 0.06   | 1.19<br>(0.99-1.42) |
| CAV1/CAV2                                                | rs917664          | A      | 48.7                  | 49.1 | 0.72         | 1.02<br>(0.91-1.16)         | 48.7   | 49.1                   | 0.75  | 1.02<br>(0.90-1.16) | 48.7 | 49.3   | 0.79           | 1.03<br>(0.85-1.25) | 51.4 | 51.5 | 0.98   | 1.00<br>(0.84-1.19) |
| CAV1/CAV2                                                | rs3779512         | A      | 66.5                  | 67.6 | 0.43         | 1.05<br>(0.93-1.20)         | 66.5   | 68.0                   | 0.28  | 1.08<br>(0.94-1.24) | 66.5 | 66.3   | 0.90           | 0.99<br>(0.81-1.21) | 71.5 | 72.4 | 0.74   | 1.03<br>(0.86-1.24) |
| CAV1/CAV2                                                | rs3807986         | C      | 55.8                  | 55.8 | 0.97         | 1.00<br>(0.88-1.13)         | 55.8   | 55.9                   | 0.93  | 1.01<br>(0.88-1.15) | 55.8 | 55.4   | 0.84           | 0.98<br>(0.81-1.19) | 68.1 | 63.5 | 0.015  | 0.80<br>(0.66-0.96) |
| CAV1/CAV2                                                | rs3807989         | C      | 34.2                  | 34.4 | 0.97         | 1.00<br>(0.88-1.13)         | 34.2   | 33.7                   | 0.56  | 0.96<br>(0.84-1.10) | 34.2 | 36.7   | 0.28           | 1.12<br>(0.92-1.36) | 29.5 | 27.5 | 0.35   | 0.91<br>(0.76-1.10) |
| CAV1/CAV2                                                | rs3779514         | A      | 23.8                  | 24.2 | 0.69         | 1.03<br>(0.89-1.19)         | 23.8   | 24.8                   | 0.41  | 1.07<br>(0.92-1.24) | 23.8 | 22.4   | 0.47           | 0.92<br>(0.73-1.16) | 27.9 | 27.9 | 0.84   | 0.98<br>(0.80-1.20) |
| CAV1/CAV2                                                | rs3815412         | A      | 61.4                  | 62.5 | 0.51         | 1.04<br>(0.92-1.18)         | 61.4   | 62.4                   | 0.63  | 1.03<br>(0.90-1.18) | 61.4 | 62.8   | 0.54           | 1.06<br>(0.88-1.29) | 62.7 | 58.5 | 0.03   | 0.82<br>(0.69-0.98) |
| CAV1/CAV2                                                | rs8713            | A      | 70.7                  | 70.9 | 0.85         | 1.01<br>(0.89-1.16)         | 70.7   | 70.8                   | 0.89  | 1.01<br>(0.87-1.17) | 70.7 | 71.2   | 0.79           | 1.03<br>(0.83-1.27) | 70.9 | 67.0 | 0.04   | 0.82<br>(0.68-0.99) |
| Chr8q22                                                  | rs284489          | C      | 63.2                  | 62.3 | 0.69         | 0.98<br>(0.86-1.10)         | 63.2   | 62.6                   | 0.92  | 0.99<br>(0.87-1.13) | 63.2 | 61.2   | 0.44           | 0.93<br>(0.77-1.12) | 71.6 | 72.2 | 0.66   | 1.04<br>(0.86-1.27) |
| CDKN2B-AS1                                               | rs2069422         | G      | 9.8                   | 9.8  | 0.96         | 1.01<br>(0.82-1.23)         | 9.8    | 9.5                    | 0.86  | 0.98<br>(0.79-1.22) | 9.8  | 10.6   | 0.57           | 1.09<br>(0.80-1.49) | 9.8  | 9.2  | 0.75   | 0.95<br>(0.71-1.28) |
| CDKN2B-AS1                                               | rs7049105         | A      | 29.6                  | 26.0 | 0.009        | 0.84<br>(0.73-0.96)         | 29.6   | 25.9                   | 0.013 | 0.83<br>(0.72-0.96) | 29.6 | 26.3   | 0.12           | 0.85<br>(0.69-1.05) | 25.0 | 25.5 | 0.75   | 1.03<br>(0.85-1.25) |
| CDKN2B-AS1                                               | rs2151280         | A      | 30.9                  | 33.1 | 0.19         | 1.11<br>(0.95-1.29)         | 30.9   | 32.5                   | 0.38  | 1.08<br>(0.91-1.27) | 30.9 | 34.5   | 0.11           | 1.19<br>(0.96-1.48) | 28.5 | 26.4 | 0.25   | 0.89<br>(0.73-1.08) |
| CDKN2B-AS1                                               | rs7851706         | C      | 87.9                  | 89.0 | 0.26         | 1.11<br>(0.92-1.34)         | 87.9   | 89.1                   | 0.24  | 1.13<br>(0.92-1.38) | 87.9 | 88.5   | 0.66           | 1.07<br>(0.80-1.43) | 84.9 | 82.1 | 0.06   | 0.80<br>(0.64-1.01) |
| <b>CDKN2B-AS1</b>                                        | <b>rs10120688</b> | A      | 40.9                  | 45.6 | <b>0.002</b> | <b>1.21<br/>(1.07-1.37)</b> | 40.9   | 44.9                   | 0.012 | 1.18<br>(1.04-1.35) | 40.9 | 47.7   | 0.004          | 1.32<br>(1.09-1.60) | 39.5 | 36.1 | 0.10   | 0.86<br>(0.72-1.03) |
| CDKN2B-AS1                                               | rs16905597        | A      | 12.2                  | 9.9  | 0.010        | 0.78<br>(0.64-0.94)         | 12.2   | 9.5                    | 0.006 | 0.74<br>(0.60-0.92) | 12.2 | 11.0   | 0.38           | 0.88<br>(0.66-1.18) | 15.1 | 16.1 | 0.57   | 1.07<br>(0.85-1.36) |
| CDKN2B-AS1                                               | rs16905599        | C      | 77.8                  | 75.2 | 0.04         | 0.86<br>(0.75-1.00)         | 77.8   | 74.9                   | 0.04  | 0.85<br>(0.73-0.99) | 77.8 | 76.0   | 0.33           | 0.90<br>(0.72-1.12) | 73.6 | 75.7 | 0.28   | 1.12<br>(0.92-1.36) |

| Genetic Association Analysis Results for CDKN2B-AS1 |                   |        |                  |      |              |                             |                  |      |               |                             |                        |      |      |                     |                    |       |       |                     |
|-----------------------------------------------------|-------------------|--------|------------------|------|--------------|-----------------------------|------------------|------|---------------|-----------------------------|------------------------|------|------|---------------------|--------------------|-------|-------|---------------------|
| Locus                                               | SNP ID            | Allele | Study 1 (N=1000) |      |              |                             | Study 2 (N=1200) |      |               |                             | Meta-analysis (N=2200) |      |      |                     | Additional Metrics |       |       |                     |
|                                                     |                   |        | Mean             | SD   | OR           | 95% CI                      | Mean             | SD   | OR            | 95% CI                      | Mean                   | SD   | OR   | 95% CI              | MA Mean            | MA SD | MA OR | MA 95% CI           |
| CDKN2B-AS1                                          | rs16923583        | A      | 16.0             | 15.3 | 0.47         | 0.94<br>(0.80-1.11)         | 16.0             | 15.3 | 0.44          | 0.93<br>(0.78-1.11)         | 16.0                   | 15.5 | 0.71 | 0.95<br>(0.73-1.24) | 20.1               | 20.2  | 0.94  | 1.01<br>(0.81-1.25) |
| CDKN2B-AS1                                          | rs1547705         | A      | 75.8             | 77.0 | 0.43         | 1.07<br>(0.91-1.27)         | 75.8             | 77.4 | 0.33          | 1.10<br>(0.91-1.31)         | 75.8                   | 76.1 | 0.97 | 1.01<br>(0.79-1.28) | 72.1               | 72.2  | 0.89  | 1.01<br>(0.84-1.23) |
| CDKN2B-AS1                                          | rs1537370         | C      | 32.5             | 29.7 | 0.06         | 0.88<br>(0.77-1.00)         | 32.5             | 30.0 | 0.11          | 0.89<br>(0.77-1.03)         | 32.5                   | 28.5 | 0.09 | 0.84<br>(0.68-1.03) | 25.2               | 27.8  | 0.24  | 1.12<br>(0.93-1.36) |
| CDKN2B-AS1                                          | rs10738607        | C      | 24.2             | 22.7 | 0.32         | 0.92<br>(0.78-1.09)         | 24.2             | 21.9 | 0.16          | 0.88<br>(0.73-1.05)         | 24.2                   | 24.5 | 0.82 | 1.03<br>(0.81-1.30) | 19.0               | 18.8  | 0.95  | 0.99<br>(0.80-1.23) |
| CDKN2B-AS1                                          | rs10965235        | A      | 45.8             | 48.7 | 0.06         | 1.13<br>(1.00-1.27)         | 45.8             | 49.4 | 0.03          | 1.16<br>(1.01-1.32)         | 45.8                   | 46.6 | 0.70 | 1.04<br>(0.86-1.25) | 57.3               | 55.8  | 0.43  | 0.93<br>(0.79-1.11) |
| CDKN2B-AS1                                          | rs4990722         | G      | 84.6             | 85.3 | 0.55         | 1.05<br>(0.89-1.25)         | 84.6             | 85.0 | 0.65          | 1.04<br>(0.87-1.25)         | 84.6                   | 86.2 | 0.41 | 1.12<br>(0.85-1.47) | 81.5               | 80.9  | 0.79  | 0.97<br>(0.79-1.20) |
| CDKN2B-AS1                                          | rs17761446        | G      | 5.7              | 4.6  | 0.08         | 0.79<br>(0.60-1.03)         | 5.7              | 4.4  | 0.05          | 0.74<br>(0.55-1.00)         | 5.7                    | 5.4  | 0.76 | 0.94<br>(0.63-1.41) | 5.2                | 5.4   | 0.86  | 1.04<br>(0.70-1.53) |
| CDKN2B-AS1                                          | rs1333049         | C      | 25.7             | 23.5 | 0.10         | 0.89<br>(0.78-1.02)         | 25.7             | 23.0 | 0.07          | 0.87<br>(0.75-1.01)         | 25.7                   | 25.2 | 0.78 | 0.97<br>(0.78-1.20) | 18.5               | 19.0  | 0.68  | 1.05<br>(0.84-1.31) |
| CDKN2B-AS1                                          | rs1333050         | C      | 79.9             | 81.1 | 0.37         | 1.07<br>(0.92-1.24)         | 79.9             | 81.1 | 0.43          | 1.07<br>(0.91-1.26)         | 79.9                   | 81.1 | 0.53 | 1.08<br>(0.85-1.36) | 89.6               | 91.6  | 0.10  | 1.28<br>(0.95-1.73) |
| CDKN2B-AS1                                          | rs10811658        | A      | 43.0             | 46.8 | 0.04         | 1.17<br>(1.01-1.35)         | 43.0             | 46.5 | 0.07          | 1.16<br>(0.99-1.35)         | 43.0                   | 47.6 | 0.08 | 1.21<br>(0.98-1.49) | 43.8               | 45.5  | 0.48  | 1.07<br>(0.90-1.27) |
| CDKN2B-AS1                                          | rs12347779        | C      | 93.2             | 93.3 | 0.97         | 1.00<br>(0.78-1.27)         | 93.2             | 93.4 | 0.89          | 1.02<br>(0.79-1.32)         | 93.2                   | 92.9 | 0.73 | 0.94<br>(0.65-1.35) | 94.1               | 92.8  | 0.28  | 0.82<br>(0.57-1.18) |
| <b>CDKN2B-AS1</b>                                   | <b>rs10965245</b> | A      | 18.6             | 15.5 | <b>0.006</b> | <b>0.80<br/>(0.68-0.94)</b> | 18.6             | 14.5 | <b>0.0005</b> | <b>0.73<br/>(0.61-0.87)</b> | 18.6                   | 18.6 | 0.97 | 1.00<br>(0.78-1.27) | 19.6               | 21.2  | 0.38  | 1.10<br>(0.89-1.35) |
| CDKN2B-AS1                                          | rs2383208         | A      | 82.3             | 81.0 | 0.24         | 0.91<br>(0.78-1.06)         | 82.3             | 81.4 | 0.42          | 0.94<br>(0.79-1.10)         | 82.3                   | 79.8 | 0.18 | 0.85<br>(0.67-1.08) | 80.8               | 82.1  | 0.47  | 1.09<br>(0.87-1.35) |
| CDKN2B-AS1                                          | rs1063192         | C      | 7.7              | 6.4  | 0.15         | 0.85<br>(0.67-1.06)         | 7.7              | 6.8  | 0.39          | 0.90<br>(0.70-1.15)         | 7.7                    | 5.2  | 0.06 | 0.68<br>(0.46-1.01) | 0                  | 0.2   | 0.98  | N/A                 |
| CDKN2B-AS1                                          | rs4977756         | C      | 35.3             | 33.0 | 0.16         | 0.91<br>(0.81-1.04)         | 35.3             | 33.9 | 0.41          | 0.95<br>(0.83-1.08)         | 35.3                   | 30.4 | 0.04 | 0.82<br>(0.67-1.00) | 34.6               | 36.3  | 0.44  | 1.07<br>(0.90-1.29) |
| CDKN2B-AS1                                          | rs10116277        | G      | 10.2             | 9.9  | 0.88         | 0.99<br>(0.81-1.20)         | 10.2             | 10.2 | 0.89          | 1.02<br>(0.82-1.26)         | 10.2                   | 9.0  | 0.43 | 0.88<br>(0.64-1.21) | 0.6                | 1.0   | 0.23  | 1.82<br>(0.68-4.85) |

|                         |                   |   |      |      |      |                     |      |      |      |                     |      |      |              |                             |      |      |      |                     |
|-------------------------|-------------------|---|------|------|------|---------------------|------|------|------|---------------------|------|------|--------------|-----------------------------|------|------|------|---------------------|
| <i>CDKN2B-AS1</i>       | rs4977574         | A | 80.0 | 80.9 | 0.48 | 1.05<br>(0.91-1.22) | 80.0 | 81.2 | 0.41 | 1.07<br>(0.91-1.26) | 80.0 | 79.9 | 0.99         | 1.00<br>(0.80-1.26)         | 87.1 | 88.1 | 0.48 | 1.10<br>(0.85-1.41) |
| <i>SIX1/SIX6</i>        | rs2350890         | C | 57.3 | 58.9 | 0.31 | 1.07<br>(0.94-1.20) | 57.3 | 58.7 | 0.42 | 1.06<br>(0.93-1.21) | 57.3 | 59.6 | 0.36         | 1.09<br>(0.90-1.32)         | 57.6 | 58.7 | 0.65 | 1.04<br>(0.87-1.24) |
| <i>SIX1/SIX6</i>        | rs4901977         | A | 58.1 | 58.3 | 0.99 | 1.00<br>(0.88-1.13) | 58.1 | 58.0 | 0.79 | 0.98<br>(0.86-1.12) | 58.1 | 59.2 | 0.67         | 1.04<br>(0.86-1.26)         | 63.3 | 65.9 | 0.28 | 1.10<br>(0.92-1.32) |
| <i>SIX1/SIX6</i>        | rs8012339         | A | 82.2 | 81.8 | 0.56 | 0.95<br>(0.82-1.12) | 82.2 | 81.4 | 0.31 | 0.92<br>(0.77-1.09) | 82.2 | 83.3 | 0.64         | 1.06<br>(0.83-1.36)         | 78.3 | 77.8 | 0.69 | 0.96<br>(0.78-1.17) |
| <i>SIX1/SIX6</i>        | rs1266416         | C | 53.5 | 52.4 | 0.50 | 0.96<br>(0.85-1.08) | 53.5 | 53.0 | 0.74 | 0.98<br>(0.86-1.12) | 53.5 | 50.7 | 0.24         | 0.90<br>(0.74-1.08)         | 44.5 | 47.8 | 0.14 | 1.14<br>(0.96-1.35) |
| <i>SIX1/SIX6</i>        | rs3759688         | A | 22.0 | 22.1 | 0.88 | 1.01<br>(0.86-1.20) | 22.0 | 21.9 | 0.97 | 1.00<br>(0.83-1.20) | 22.0 | 22.6 | 0.63         | 1.06<br>(0.83-1.35)         | 29.4 | 28.6 | 0.86 | 0.98<br>(0.82-1.18) |
| <b><i>SIX1/SIX6</i></b> | <b>rs11849906</b> | G | 7.3  | 6.8  | 0.43 | 0.91<br>(0.72-1.15) | 7.3  | 7.7  | 0.77 | 1.04<br>(0.81-1.32) | 7.3  | 3.9  | <b>0.006</b> | <b>0.53<br/>(0.34-0.83)</b> | 8.4  | 10.1 | 0.18 | 1.23<br>(0.91-1.67) |
| <i>SIX1/SIX6</i>        | rs10148202        | A | 15.8 | 14.3 | 0.13 | 0.88<br>(0.74-1.04) | 15.8 | 14.5 | 0.18 | 0.88<br>(0.74-1.06) | 15.8 | 13.9 | 0.24         | 0.85<br>(0.65-1.12)         | 17.0 | 17.3 | 0.72 | 1.04<br>(0.84-1.30) |
| <i>SIX1/SIX6</i>        | rs7156317         | A | 65.5 | 65.9 | 0.73 | 1.02<br>(0.90-1.16) | 65.5 | 66.2 | 0.61 | 1.04<br>(0.90-1.19) | 65.5 | 65.0 | 0.87         | 0.98<br>(0.81-1.20)         | 58.0 | 59.7 | 0.52 | 1.06<br>(0.89-1.26) |
| <i>SIX1/SIX6</i>        | rs7146104         | A | 3.7  | 4.4  | 0.17 | 1.24<br>(0.91-1.68) | 3.7  | 4.3  | 0.23 | 1.22<br>(0.88-1.69) | 3.7  | 4.7  | 0.25         | 1.32<br>(0.82-2.11)         | 6.8  | 6.5  | 0.70 | 0.93<br>(0.66-1.32) |
| <i>SIX1/SIX6</i>        | rs10483727        | C | 12.4 | 11.9 | 0.67 | 0.96<br>(0.78-1.18) | 12.4 | 11.9 | 0.97 | 0.99<br>(0.77-1.28) | 12.4 | 11.8 | 0.66         | 0.92<br>(0.64-1.32)         | 1.2  | 1.4  | 0.76 | 1.13<br>(0.52-2.44) |
| <i>SIX1/SIX6</i>        | rs33912345        | A | 12.5 | 11.2 | 0.25 | 0.88<br>(0.71-1.10) | 12.5 | 11.1 | 0.91 | 0.99<br>(0.77-1.27) | 12.5 | 11.6 | 0.57         | 0.90<br>(0.62-1.30)         | 1.1  | 1.1  | 0.93 | 0.96<br>(0.42-2.23) |

SNP: single nucleotide polymorphism; POAG: primary open-angle glaucoma; ICAARE-Glaucoma: International Consortium of African Ancestry REsearch in Glaucoma; HPG: high pressure glaucoma; NPG: normal pressure glaucoma; AA: African American; FU: Allele frequency in controls; FA: allele frequency in POAG cases; P: p value from the logistic regression using additive model with the justification of age and gender; OR: odds ratio with 95% confidence interval in the parenthesis.
